# Supplementary material for: Migratory Activity of Circulating Mononuclear Cells Is Associated With Cardiovascular Mortality in Type 2 Diabetic Patients With Critical Limb Ischemia
Source: Oxford University Press journal article supplement (doi:10.2337/dc13-2084), 2014-02-27

## SUPPLEMENTARY DATA

Spinetti et al. Migratory activity of circulating mononuclear cells is associated with cardiovascular mortality in type 2 diabetic patients with critical limb ischemia

**Supplementary Table 1.** Clinical outcomes

| Events                                | N (%*)    |
|---------------------------------------|-----------|
| Event-free                            | 87 (73.1) |
| Amputation only                       | 9 (7.6)   |
| Death only (cardiovascular)           | 13 (10.9) |
| Death only (other)                    | 6 (5.0)   |
| Amputation and death (cardiovascular) | 3 (2.5)   |
| Amputation and death (other)          | 1 (0.8)   |

\*because of rounding, not all percentages total 100

Frequency of single and combined events registered during the 18-month follow-up.

## SUPPLEMENTARY DATA

**Supplementary Figure 1.** Cumulative incidence of amputation (A) and cardiovascular death (B) during 18 months follow- up.

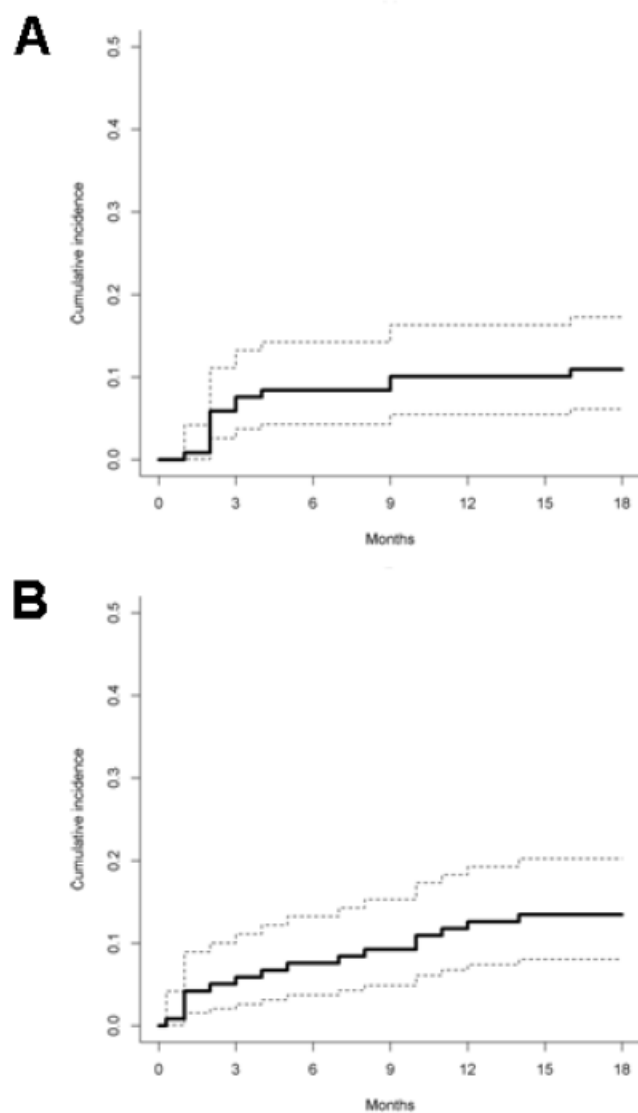

## SUPPLEMENTARY DATA

**Supplementary Figure 2.** Flow cytometry characterization of circulating MNCs. (A) Representative scattergrams of the gating strategy used to detect cells of interest within the total mononuclear cells (MNCs).  $CD45^{dim}CD34^{pos}CXCR4^{pos}KDR^{pos}$  cells (red square, Q2-1) were identified following the ISHAGE guidelines. (B) Box plots showing the distribution of  $CD45^{pos}CD34^{pos}$  cells and  $CD45^{dim}CD34^{pos}CXCR4^{pos}KDR^{pos}$  cells assessed by flow cytometry at the occasion of revascularization of CLI in patients dead for cardiovascular causes (N=16) and event-free patients (N=96). Boxes are bordered at the 25th and the 75th percentiles of the predictor variable and a median line at the 50th percentile. Whiskers extend from the box to the upper and lower adjacent values and are capped with an adjacent line.

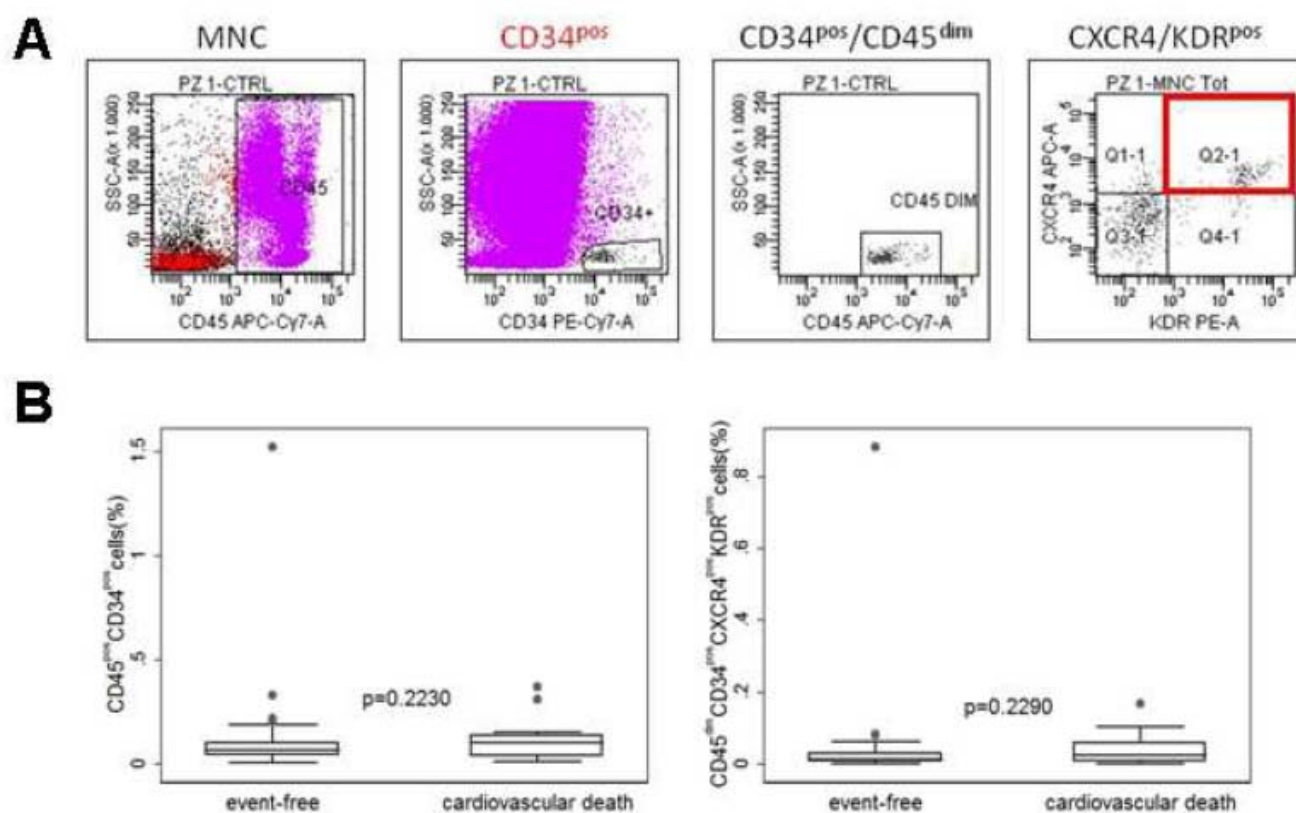

## SUPPLEMENTARY DATA

**Supplementary Figure 3.** Superiority of the predictive model comprising clinical variables in combination with cell migration over the model using clinical variables only. The 18-month risks predicted by a clinical model considering age, coronary artery disease, CRP and eGFR and a full model comprising the same parameters plus CD45<sup>dim</sup>CD34<sup>pos</sup>CXCR4<sup>pos</sup>KDR<sup>pos</sup> cell migration towards vehicle (A) or SDF-1 $\alpha$  (B) are compared in cardiovascular death (red square) and event-free subjects (black circle). A correct reclassification by the full model occurs when a patient who had an event shows a higher predicted risk (thus falling above the bisector), or a patient who did not have an event shows a lower predicted risk (thus falling below the bisector).

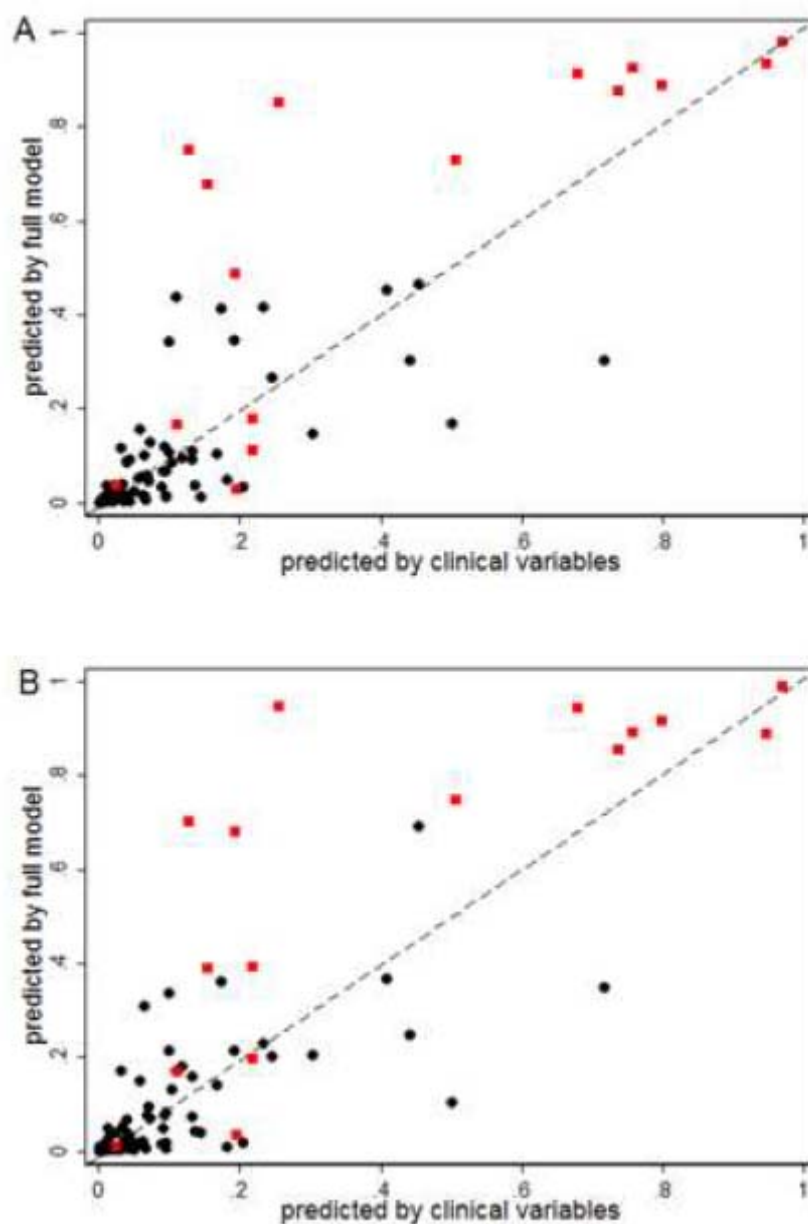

Supplement: dc132084supplementarydata.pdf [file dc132084supplementarydata.pdf]
